# Supplementary material for: Genetic variations associated with response to dutasteride in the treatment of male subjects with androgenetic alopecia
Source: PubMed Central journal article supplement (PMC6746394; doi:10.1371/journal.pone.0222533), 2019-09-16

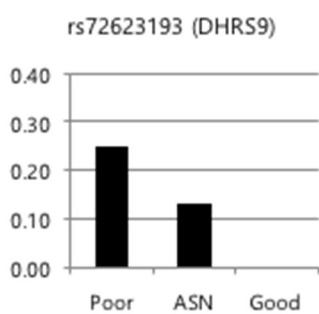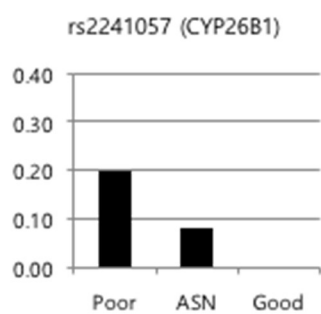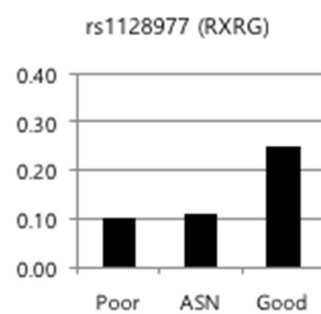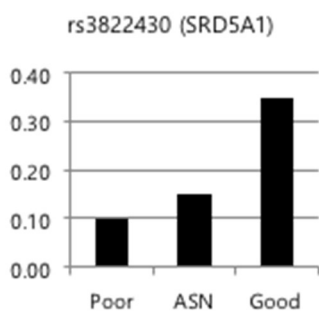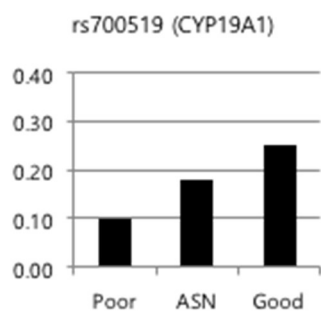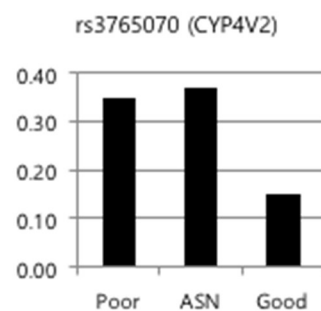

Supplement: pone.0222533.s018.pdf [file pone.0222533.s018.pdf]
