# Supplementary material for: Genetic variations associated with response to dutasteride in the treatment of male subjects with androgenetic alopecia
Source: PLoS One. 2019 Sep 16;14(9):e0222533. doi: 10.1371/journal.pone.0222533 (PMC6746394; doi:10.1371/journal.pone.0222533)
Supplement: S9 Table — Effect, |β|, and R2 show the minimum to maximum range for each SNP used based on quantitative regression test results. (XLSX) [file pone.0222533.s009.xlsx]

## Sheet: S9 Table
S9 Table. Genes and the number of SNPs commonly and significantly associated (p <0.05) with response to dutasteride as determined by 4 association tests. Effect, |β|, and R2 show the minimum to maximum range for each SNP used based on quantitative regression test results.
Gene	SNP Counts	Region	Effect	|β|	R2
ESR1	21	Intronic	+	8.38-13.98	0.13-0.25
DHRS9	5	1 Exonic (syn),	-	10.13-11.70	0.13-0.23
		4 intronic
HSD17B12	4	Intronic	-	10.79-18.47	0.14-0.21
CYP4F2	1	Upstream	-	10.08	0.1084
IGFBP3	1	Intronic	-	15.28	0.1773
